# Supplementary material for: Tunable concentration/excitation-dependent deep-red and white light emission in single-phase Eu2+-activated Sc-based oxide phosphors for blue/UV-LEDs
Source: Royal Society of Chemistry journal article supplement (doi:10.1039/d2tc03146a), 2022-01-01
Supplement: d2tc03146a1.pdf [file d2tc03146a1.pdf]

## Electronic supplementary information

### **Tunable concentration/excitation-dependent deep-red and white light emission in a single-phase Eu<sup>2+</sup>-activated Sc-based oxide phosphors for blue/UV-LEDs**

Shuai Huang,<sup>a,b</sup> Mengmeng Shang,<sup>\* a</sup> Minliang Deng,<sup>a</sup> Yu Yan,<sup>a</sup> Peipei Dang<sup>c</sup> and Jun Lin<sup>\* c</sup>

<sup>a</sup>Key Laboratory for Liquid-Solid Structural Evolution and Processing of Materials Ministry of Education, School of Material Science and Engineering, Shandong University, 17923 Jingshi Road, Jinan 250061, P. R. China. E-mail: mmshang@sdu.edu.cn

<sup>b</sup>Address College of Materials Science and Engineering, Nanchang University, Nanchang 330031, P. R. China

<sup>c</sup>State Key Laboratory of Rare Earth Resource Utilization, Changchun Institute of Applied Chemistry, Chinese Academy of Sciences, Changchun 130022, P. R. China. E-mail: jlin@ciac.ac.cn

**Table S1.** The values of n and r for four different substitutable sites

| <b>Cation</b> | <b>Polyhedron</b>  | <b>n</b> | <b>r</b> | <b>n*r</b> |
|---------------|--------------------|----------|----------|------------|
| <b>Sr</b>     | Sr1O <sub>6</sub>  | 6        | 1.18     | 7.08       |
|               | Sr2O <sub>9</sub>  | 9        | 1.31     | 11.79      |
| <b>Sc</b>     | Sr3O <sub>12</sub> | 12       | 1.44     | 17.28      |
|               | ScO <sub>6</sub>   | 6        | 0.745    | 4.47       |

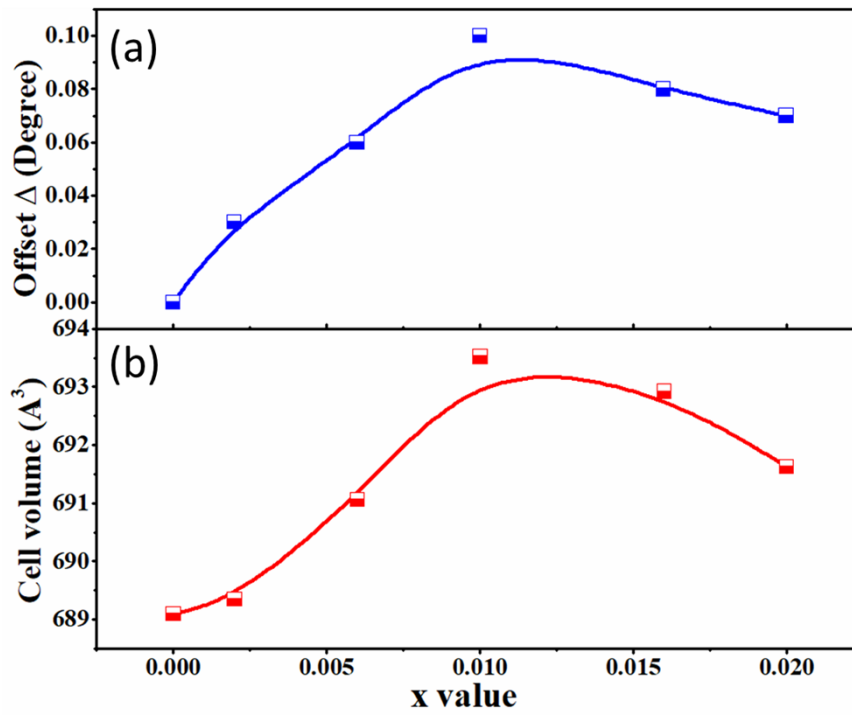

Fig. S1 Dependence of the offset ( $\Delta$ ) and cell volume ( $V$ ) on the  $x$  value.

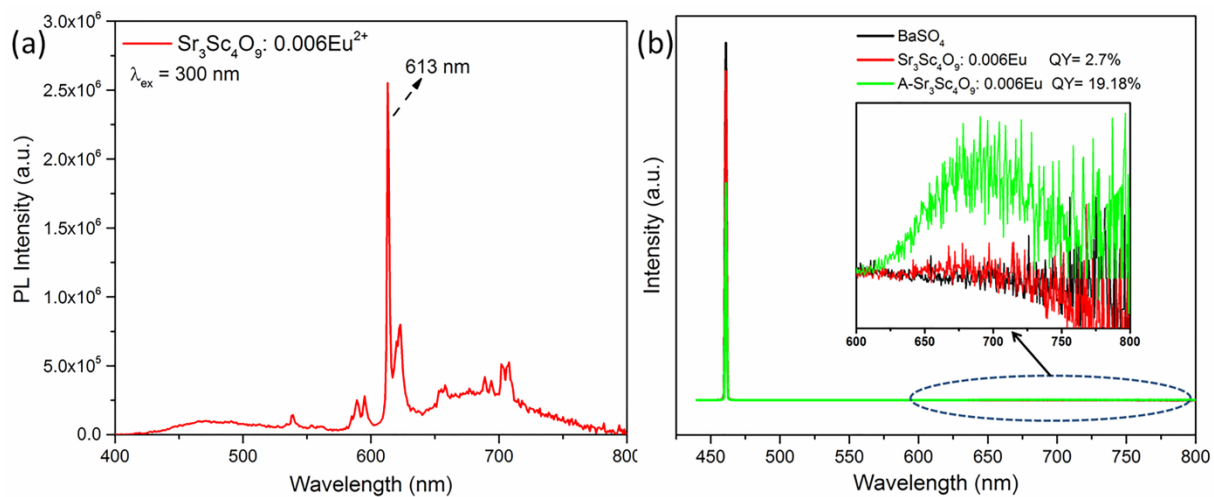

**Fig. S2** (a) PL spectra of  $\text{Sr}_3\text{Sc}_4\text{O}_9: 0.06\text{Eu}$  sample upon 300nm excitation. (b) Quantum efficiency spectra of  $\text{Sr}_3\text{Sc}_4\text{O}_9:0.006\text{Eu}$  and  $\text{A-Sr}_3\text{Sc}_4\text{O}_9:0.006\text{Eu}$ .

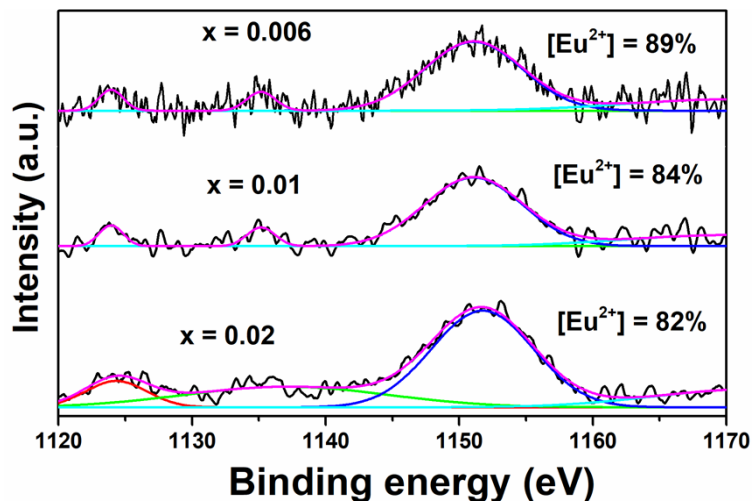

**Fig. S3** The normalized Eu-3d XPS spectra of  $\text{Sr}_3\text{Sc}_4\text{O}_9:\text{xEu}$  ( $x = 0.006, 0.01, 0.02$ ).

The high-resolution XPS spectra at the Eu 3d of  $\text{Sr}_3\text{Sc}_4\text{O}_9:\text{xEu}$  ( $x = 0.006, 0.01$  and  $0.02$ ) phosphors were applied to compare the ratio changing of  $\text{Eu}^{2+}$  and  $\text{Eu}^{3+}$ . The shapes and binding energies are in good agreement with the characteristic binding peaks of  $\text{Eu}^{3+} 3d_{5/2}$  (1135 eV) and  $\text{Eu}^{2+} 3d_{3/2}$  (1155 eV) and  $3d_{5/2}$  (1126 eV), indicating that  $\text{Eu}^{3+}$  and  $\text{Eu}^{2+}$  coexist. A semiquantitative analysis of the integrated peak area can provide the concentration ratio of  $\text{Eu}^{2+}/\text{Eu}^{3+}$ . The concentrations of  $\text{Eu}^{2+}$  ion for  $\text{Sr}_3\text{Sc}_4\text{O}_9:\text{xEu}$  ( $x = 0.006, 0.01$  and  $0.02$ ) phosphors are calculated to be 89%, 84% and 82%, respectively.

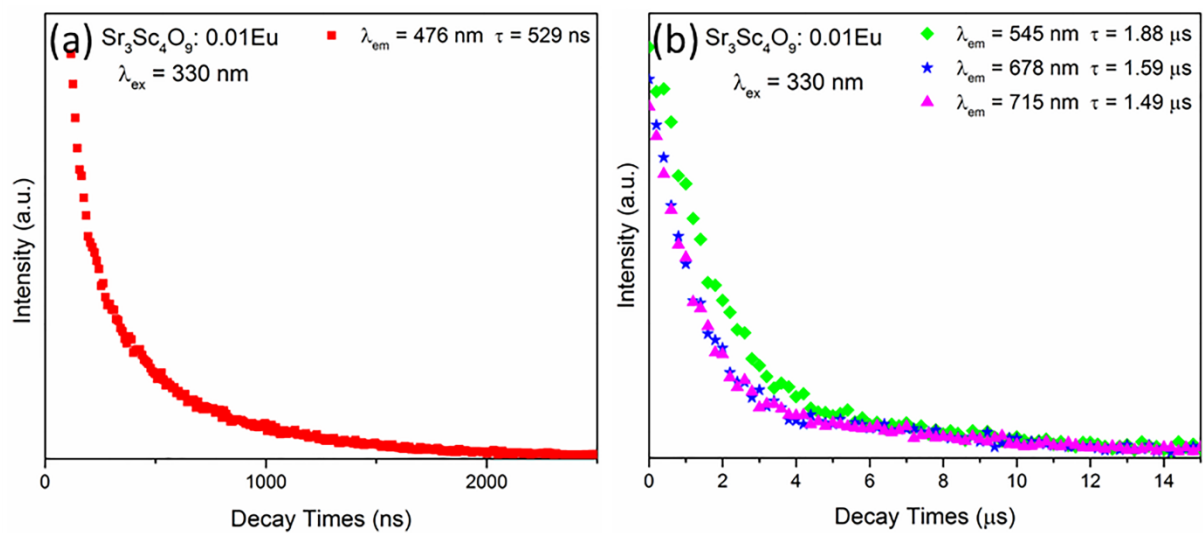

**Fig. S4** The decay curves of  $\text{Sr}_3\text{Sc}_4\text{O}_9: 0.01\text{Eu}$  at different monitoring wavelengths.

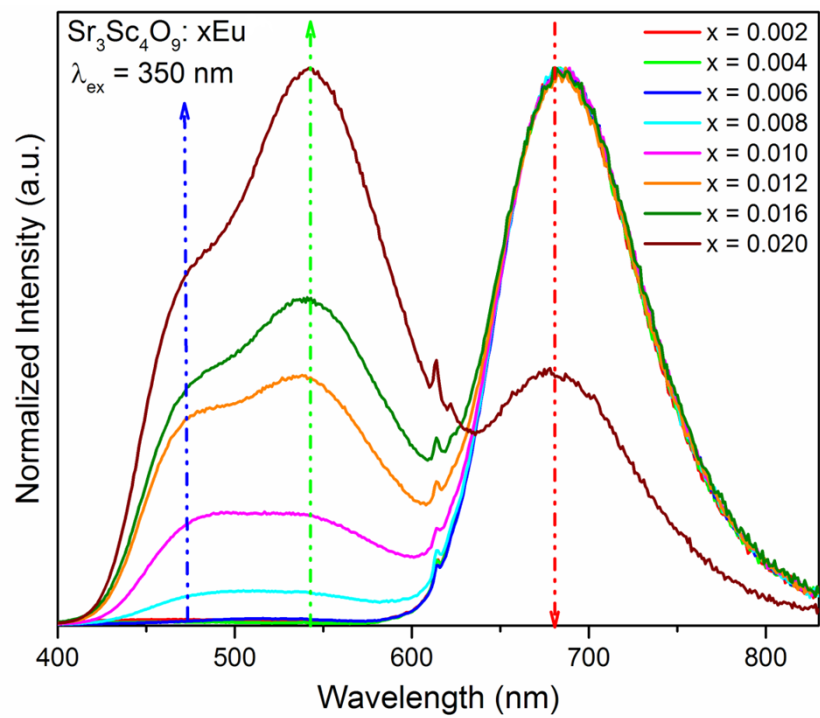

**Fig. S5** Normalized PL spectra of  $\text{Sr}_3\text{Sc}_4\text{O}_9:\text{xEu}$  samples upon 350nm excitation.

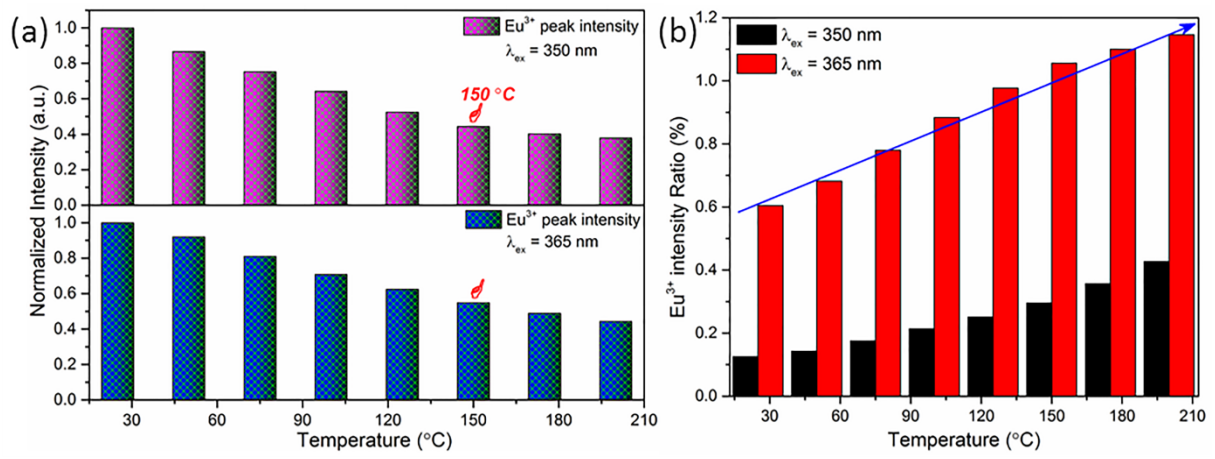

**Fig. S6** Eu<sup>3+</sup> peak intensities (a) and Eu<sup>3+</sup> intensities ratio to the integrated PL intensities (b) of Sr<sub>3</sub>Sc<sub>4</sub>O<sub>9</sub>: 0.01Eu as a function of temperature.



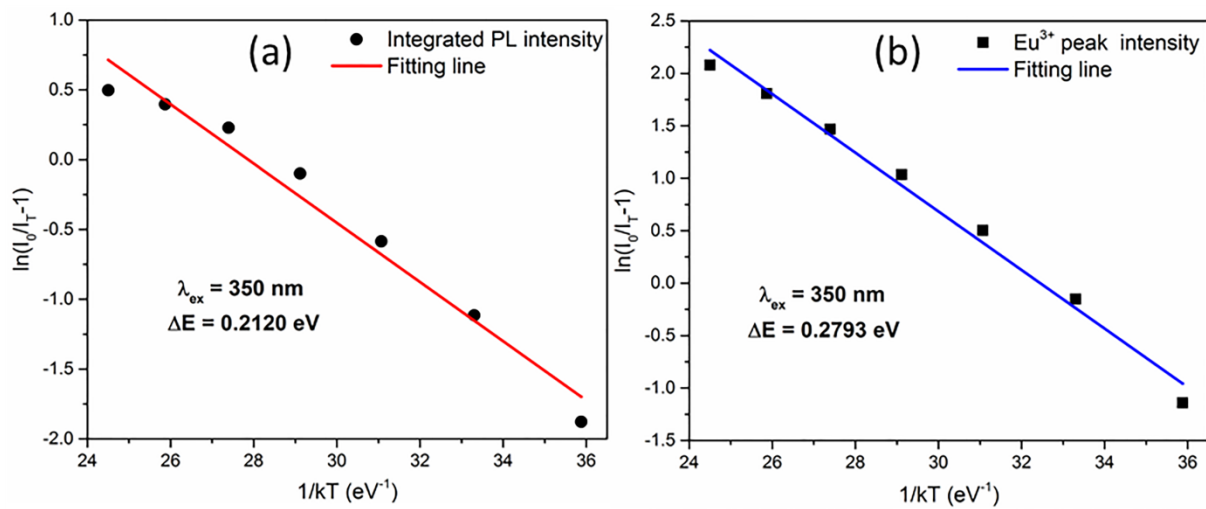

**Fig. S7** The plot of  $\ln[I_0/I(T) - 1]$  vs.  $1/T$  for  $\text{Eu}^{2+}$  (a) and  $\text{Eu}^{3+}$  (b) emission in  $\text{Sr}_3\text{Sc}_4\text{O}_9$  host.

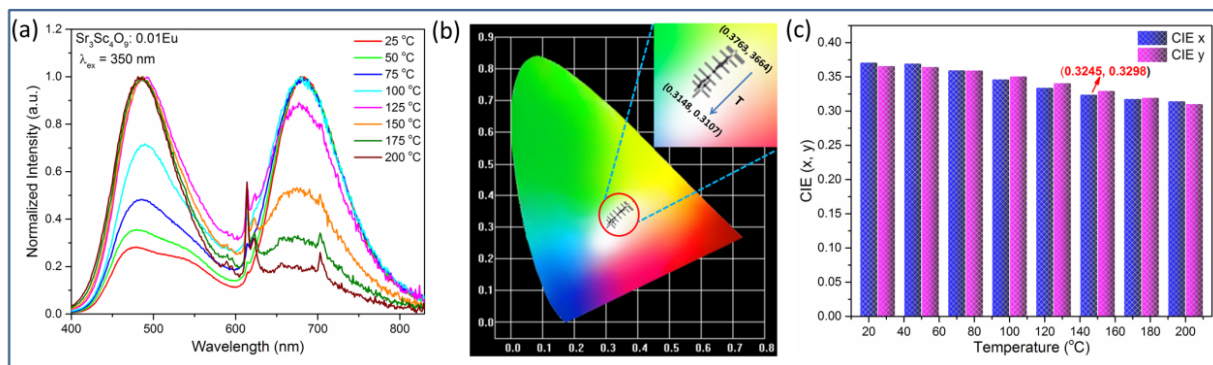

**Fig. S8** The spectral profile (a), CIE coordinates diagram (b) and CIE coordinates (c) of  $\text{Sr}_3\text{Sc}_4\text{O}_9:0.01\text{Eu}$  sample (upon 350 nm excitation) as a function of temperature.
